# Supplementary material
Source: PubMed Central journal article supplement (PMC4178830)
Supplement: JVI.01714-14_zjv999099560so1.pdf [file JVI.01714-14_zjv999099560so1.pdf]

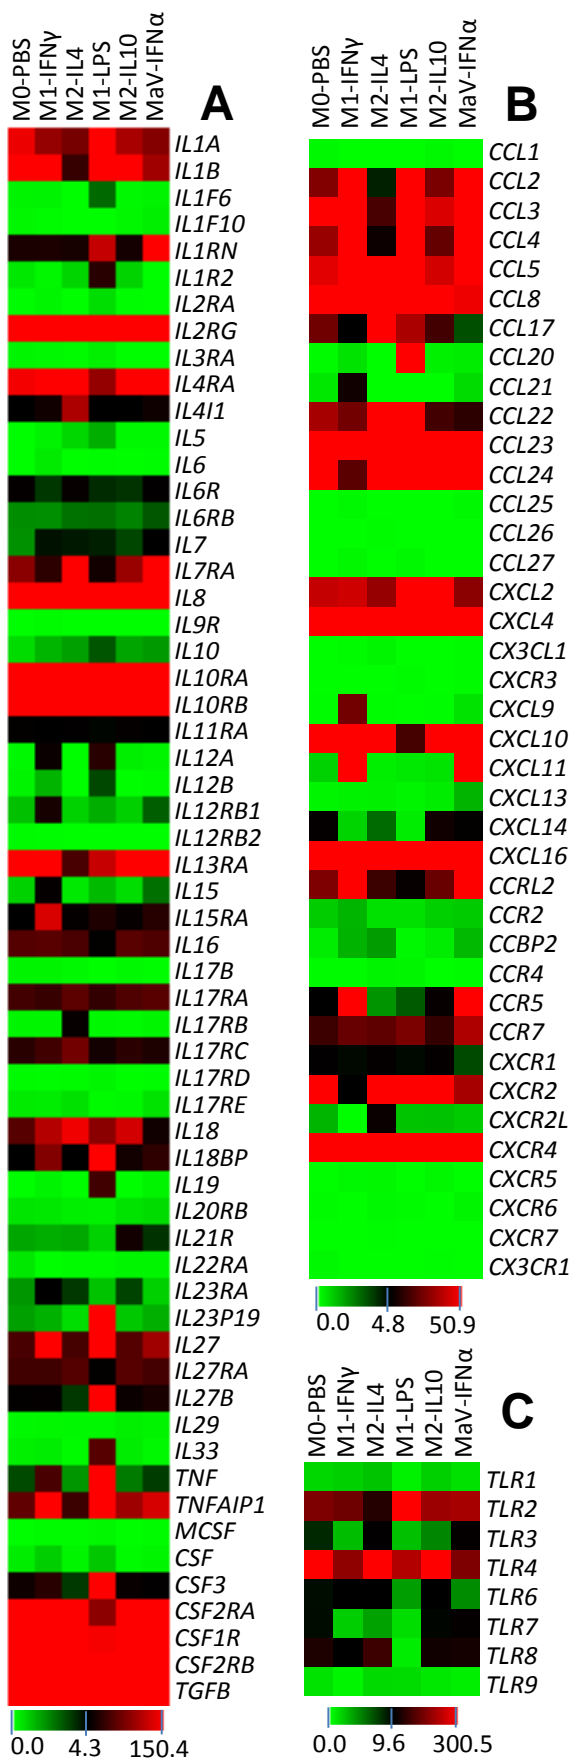

**Figure S1.** Family-wide transcriptomic analysis of porcine cytokines/chemokines and their receptor-related genes. Using PRRSV-infected macrophages at different activation statuses, the expression of most cytokines/chemokines, and their receptors at the transcriptomic level was revealed. In addition to inflammatory cytokines analyzed, including IL-1 $\beta$ , IL-6, IL-8, and IL-12, multiple status-specific identifiers could be novel signature genes. (A) Differential expression of cytokines and their receptor-related genes. (B) Differential expression of chemokines and their receptor-related genes. (C) Differential expression of porcine Toll-like receptors genes (TLRs), which act as major innate immune receptors in regulation of cytokine/chemokine production corresponding to different activation statuses in monocytic cells. Transcripts in heatmaps were labeled with the official gene symbols from <http://www.ncbi.nlm.nih.gov/gene>. The color scale under each heatmap illustrates the midpoint and range of RPKM values of listed transcripts.

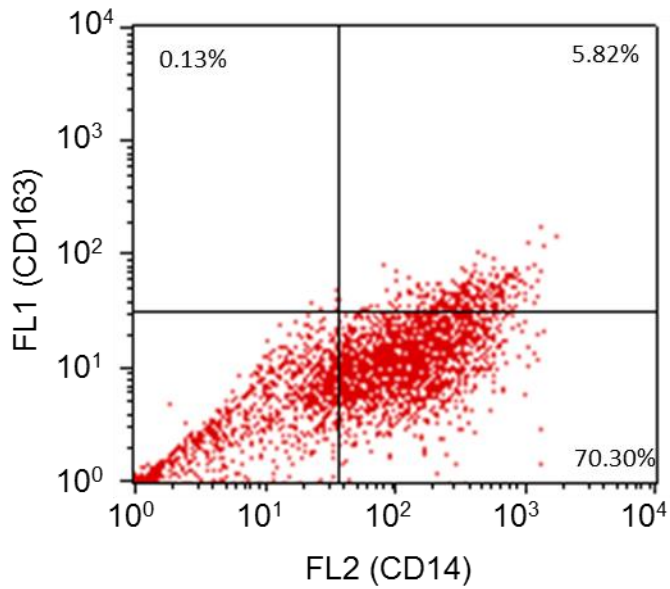

**Figure S2.** Two-color immunofluorescence facilitated flow cytometric analysis of purified monocytes with mAbs to CD14 and CD163. Monocytes used in this study are predominant CD14<sup>+</sup> CD163<sup>low</sup> (>90%) and few CD14<sup>+</sup>CD163<sup>high</sup> (5.8%).

**Supplemental Table S1: PCR primers used for RT-PCR assay of porcine GBPs and PRRSV detection**

| <b>Gene</b>             | <b>Primer sequence (5'-3')</b>                                          | <b>Product size (bp)</b> | <b>GenBank RefSeq RNA Accession</b> |
|-------------------------|-------------------------------------------------------------------------|--------------------------|-------------------------------------|
| <i>GBP1</i>             | Forward: CTGAGTCCGGCACGAGTTTG<br>Reverse: CACCAGTAAGCATCGCGCAT          | 167                      | NM_001128473.1                      |
| <i>GBP2</i>             | Forward: ACAGGGATTCAAGAAGGAGA<br>Reverse: TAGTTGAGTGGCAATGGTTT          | 191                      | NM_001128474.1                      |
| <i>GBP4</i>             | Forward: AGGAAACGATGCTGGAGCACAA<br>Reverse: ATGCAATGCTAGCCACGTCAAG      | 177                      | XM_001927929.3                      |
| <i>GBP5</i>             | Forward: TATGACCAGCTGATGGGCCAGAAT<br>Reverse: TCTGTTTGGCTTCTAGCAGGGTCT  | 175                      | XM_003125920.3                      |
| <i>GBP6</i>             | Forward: TGCTGCAGAATGAAGAGGCA<br>Reverse: TTTCTGGGCACTTGGCAAT           | 173                      | XM_003355299.1                      |
| <i>GBP1L</i>            | Forward: ACCAGCTGACAGAGAAGCTGGAAA<br>Reverse: TCTCTGCATTCATCTCCTGGGACT  | 174                      | XM_003481515.1                      |
| <i>GBP2L</i>            | Forward: CAGAAACAACCTCCTTGAGGAGGGA<br>Reverse: GGCGATGGTTTGGCATCTTGAAGT | 199                      | XM_003125922.3                      |
| <i>GBP<sub>hp</sub></i> | Forward: GCTCAGTATGTGTGGGGCTT<br>Reverse: TGATACGGTGAGTTCTGACACA        | 167                      | XM_003125925.1                      |
| <i>PRRSV-N</i>          | Forward: ATGGCCAGCCAGTCAATCA<br>Reverse: ACGGTCGCCCTAATTGAATAGGTG       | 436                      | AF494042                            |
| <i>GAPDH</i>            | Forward: TGGYATCGTGGAAGGRCTCAT<br>Reverse: RTGGGWGTYGCTGTTGAAGTC        | 370                      | NM_001206359.1                      |
